# Supplementary material for: The Arabidopsis SWI2/SNF2 Chromatin Remodeler BRAHMA Regulates Polycomb Function during Vegetative Development and Directly Activates the Flowering Repressor Gene SVP
Source: PubMed Central journal article supplement (PMC4304717; doi:10.1371/journal.pgen.1004944), 2015-01-23
Supplement: pgen.1004944.s001.pdf [file pgen.1004944.s001.pdf]

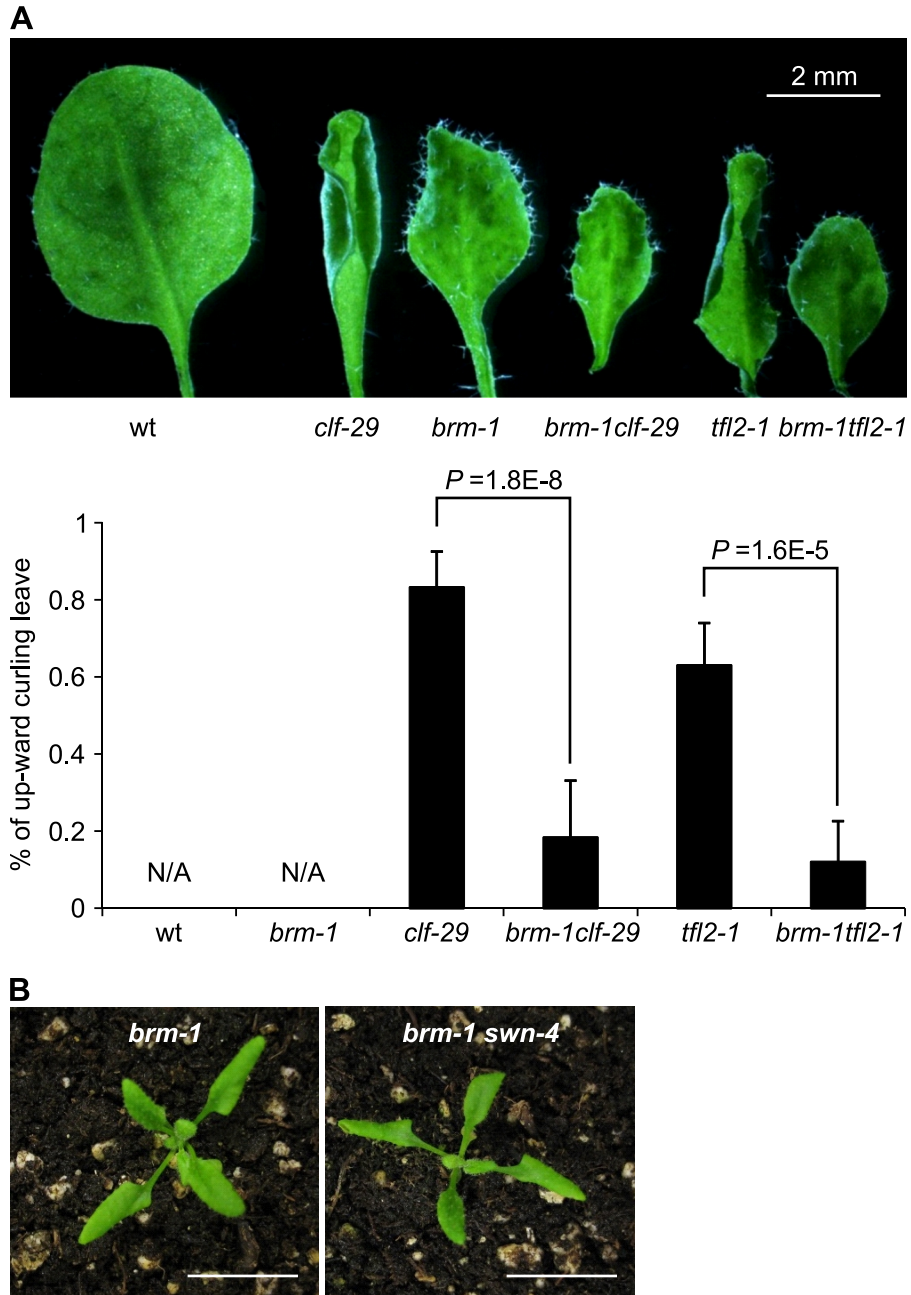

Fig S1
