# Supplementary material for: The Arabidopsis SWI2/SNF2 Chromatin Remodeler BRAHMA Regulates Polycomb Function during Vegetative Development and Directly Activates the Flowering Repressor Gene SVP
Source: PubMed Central journal article supplement (PMC4304717; doi:10.1371/journal.pgen.1004944), 2015-01-23
Supplement: pgen.1004944.s009.pdf [file pgen.1004944.s009.pdf]

**Table S1:** Summary of changes in H3K27me3 levels, in CLF occupancy and in gene expression in *brm-1* mutants.

|                  | H3K27me3 in<br><i>brm</i> mutant | CLF binding<br>in <i>brm</i> mutant | SWN binding<br>in <i>brm</i> mutant | Expression in<br><i>brm</i> mutant |
|------------------|----------------------------------|-------------------------------------|-------------------------------------|------------------------------------|
| <i>AT1G78290</i> | Increase                         | Increase                            | Increase                            | Decrease                           |
| <i>AT1G54740</i> | Increase                         | Increase                            | Increase                            | Decrease                           |
| <i>AT3G22160</i> | Increase                         | Increase                            | Increase                            | No change                          |
| <i>AT4G37540</i> | Increase                         | Increase                            | Increase                            | Decrease                           |
| <i>SVP</i>       | Increase                         | Increase                            | Increase                            | Decrease                           |
| <i>BEL1</i>      | Increase                         | Increase                            | Increase                            | Decrease                           |
| <i>AT5G33390</i> | Increase                         | Increase                            | Increase                            | No change                          |
| <i>TCP2</i>      | Increase                         | Increase                            | Increase                            | Decrease                           |
| <i>MIR166A</i>   | Increase                         | Increase                            | Increase                            | Decrease                           |
| <i>WRKY23</i>    | Decrease                         | Decrease                            | Decrease                            | Increase                           |
