# Supplementary material for: The Arabidopsis SWI2/SNF2 Chromatin Remodeler BRAHMA Regulates Polycomb Function during Vegetative Development and Directly Activates the Flowering Repressor Gene SVP
Source: PubMed Central journal article supplement (PMC4304717; doi:10.1371/journal.pgen.1004944), 2015-01-23
Supplement: pgen.1004944.s010.pdf [file pgen.1004944.s010.pdf]

## Table S2. Oligonucleotides Used in This Study

### Gene-specific primers pairs for qRT-PCR

AT1G06980-F: 5'-AGGACACTCCTCGCCGGAAG-3'  
AT1G06980-R: 5'-TCGACGCCGACGACACTACT-3'  
AT1G54740-F: 5'-CATGCGGAGGTGGAGACCGA-3'  
AT1G54740-R: 5'-TTTCTGCGCTTGCACCACCA-3'  
AT3G22160-F: 5'-ACAACCACCACTGCCGGTGA-3'  
AT3G22160-R: 5'-CGGACCCGAAAGCCATAGCG-3'  
AT4G37540-F: 5'-TCCAACGTCCTGCTTTGTTTCAGT-3'  
AT4G37540-R: 5'-TCACAGGAGATCATCAACGACGGA-3'  
SVP-F: 5'-TTCCATTTTCAGTCGTCCTTGTC-3'  
SVP-R: 5'-GAATCTTTTCTCTCGCCATCAC-3'  
BEL1-F: 5'-AATCCTACAAGCATCAGTCTCC-3'  
BEL1-R: 5'-CTTTCCTTTACTCCAAGACTGC-3'  
TCP2-F: 5'-TCTTGACTTCTAAAGGACCACG-3'  
TCP2-R: 5'-GGAAAATGAGTGTTGTTGAGTGA-3'  
AT5G33390-F: 5'-ATATCCAAATCCCCACAAATA-3'  
AT5G33390-R: 5'-AACTAGGTTACGGGTCTGTTC-3'  
WRKY23-F: 5'-ACTACCCGTCGTCACAAAGC-3'  
WRKY23-R: 5'-CAAAGTCTTGATGCTGCTGAG-3'  
BRM-F: 5'-TTTAGAAAGGAAAAGGATTAGGC-3'  
BRM-R: 5'-GCCGTTTCGCATAACCTCA-3'  
API1-F: 5'-GAAGGCCATACAGGAGCAA-3'  
API1-R: 5'-ACTGCTCCTGTTGAGCCCTA-3'  
FT-F: 5'-CTTGGCAGGCAAACAGTGTATGCAC-3'  
FT-R: 5'-GCCACTCTCCCTCTGACAATTGTAGA-3'  
FIE-F: 5'-CGTTTCTTCGATGTCTTCGT-3'  
FIE-R: 5'-ACGACTCTTCCTTATCTTCATCAG-3'  
EMF2-F: 5'-CAGAAGACTGAAGTAACTGAAGAC-3'  
EMF2-R: 5'-AAATTGAGGAGATCGTGGGT-3'  
VRN2-F: 5'-GCAGAAATAACACCAGGAGAC-3'  
VRN2-R: 5'-CCACGGTTTCCATCATTTCAG-3'  
CLF-F: 5'-ATTATTCGCATGACCCTTGAG-3'  
CLF-R: 5'-CATGTCTTGCCCTTGATTTAC-3'  
SWN-F: 5'-CAGGGAATGATAATGATGAGGT-3'  
SWN-R: 5'-GACCAGCAGACTTTGTAGAG-3'  
GAPDH-F: 5'-CTTGGAAGGAGCTAGGAATTGACA-3'  
GAPDH-R: 5'-ATGTGTTTCCCTGCACCTTCTC-3'  
SMZ-F: 5'-AGGGAGAAGGAGCCATGAAGTTTGGTG-3'

SMZ-R: 5'-GTCTTCAGAGGTTTCATGGTTGCCATG-3'  
AGL24-F: 5'-CAGAGTCGGTGACCACAAATG-3'  
AGL24-R: 5'-ATGGAAGCCTAACCAACAAAC-3'

### **Oligonucleotide probes for detecting microRNAs**

miR156: 5'-TGACAGAAGAGAGTGAGCACCTGTCTC-3'  
U6: 5'-GAGAAGATTAGCATGGCCCCTCCTGTCTC-3'

### **Primers for the *XVE::aMIRBRM* transgene construct**

BRMmiR-s-I: 5'-GATACAAATTTGCGGTACGGCGTTCTCTCTTTTGTATTCC-3'  
BRMmiR-a-II: 5'-GAACGCCGTACCGCAAATTTGTATCAAAGAGAATCAATGA-3'  
BRMmiR\*s-III: 5'-GAACACCGTACCGCATATTTGTTTCACAGGTCGTGATATG-3'  
BRMmiR\*a-IV: 5'-GAAACAAATATGCGGTACGGTGTCTACATATATATTCCT-3'  
BRMmiR-A: 5'-GGGGACAAGTTTGTACAAAAAAGCAGGCTTCCTGCAAGGCGATTAAGTTGGGTAAC-3'  
BRMmiR-B: 5'-GGGGACCACTTTGTACAAGAAAGCTGGGTTCGCGGATAACAATTTACACAGGAAACAG-3'

### **Primers used for ChIP-qPCR analyses**

AT1G06980-F: 5'-ATGGTCAATCCCGCTTTGGT-3'  
AT1G06980-R: 5'-GCCAGACAACACCTTAGGCT-3'  
AT1G54740-F: 5'-CATGCGGAGGTGGAGACCGA-3'  
AT1G54740-R: 5'-TTTCTGCGCTTGCACCACCA-3'  
AT3G22160-F: 5'-GTTTGGGACGGTGGATGGTT-3'  
AT3G22160-R: 5'-CGTTTTCTCATTGCAACCTCG-3'  
AT4G37540-F: 5'-TTGAGACTGTTCTTCGCGGC-3'  
AT4G37540-R: 5'-TCTCCGTCGTGGATCTGGAG-3'  
SVP-1-F: 5'-CAACGGCGAGACAAGTGA-3'  
SVP-1-R: 5'-GAGAGAAAGAAAGACCTGGAGC-3'  
SVP-2-F: 5'-TTCTGAAATGTCATCTTCCAA-3'  
SVP-2-R: 5'-CTGAAGAACATCAAGGGCTACA-3'

SVP-3-F: 5'-CAACGGCGAGACAAGTGA -3'  
SVP-3-R: 5'-GAGAGAAAGAAAGACCTGGAGC-3'  
SVP-4-F: 5'-GCAGTCAAAGAACTTGGAGAA -3'  
SVP-4-R: 5'-GTTACAGAAATCGGGAAAGA -3'  
BEL1-F: 5'-TCATGGTATGAGAAGATTTGCCT -3'  
BEL1-R: 5'-TCTACAAGAACCCATCTCCAAGA -3'  
TCP2-F: 5'-TCTTGACTTCTAAAGGACCACG-3'  
TCP2-R: 5'-GGAAAATGAGTGTTGTTGAGTGA-3'  
AT5G33390-F: 5'-AATTCCGGCTGCATTTATGGG -3'  
AT5G33390-R: 5'-GTACCACAACGTTCCAACAGG -3'  
miR156D-F: 5'-TCAAGTCTTTGTTAGTTGCTGTT-3'  
miR156D-R: 5'-ATTAGTCCAGAAACCGATGAAA-3'  
WRKY23-F: 5'-ACTACCCGTCGTCACAAAGC-3'  
WRKY23-R: 5'-CAAAGTCTTGATGCTGCTGAG-3'  
ACTIN 2/7-F: 5'-CGTTTCGCTTTCCTTAGTGTTAGCT-3'  
ACTIN 2/7-R: 5'-CTTGAAGAAGAAGAAGATGATA-3'  
AG-F: 5'-ATGCTGAAGTCGCACTCATCGTCT-3'  
AG-R: 5'-GAGCACGAGAAGAAGAAGAAACCTG-3'  
TA3-F: 5'-GATTCTTACTGTAAAGAACATGGCATTGAGAGA-3'  
TA3-R: 5'-TCCAAATTTCCCTGAGGTGCTTGTAACC-3'  
AT2G22560-F: TAATGTCCCTAATGTTCCCAA  
AT2G22560-R: CTCAGGCTTACTCAAACCCGA  
SMZ-F: 5'-CGAAGATCAAGATCGGAAAGTAC-3'  
SMZ-R: 5'-CCGACGAGCATCAGCCAC-3'  
AGL24-F: 5'-CTTTGCGATGCTGATGTTG-3'  
AGL24-R: 5'-GATCTCCGAGCCTACTGATAAT-3'

**Primers used for generating *YFP-SWN* transgene construct**

SWN-F:

GGGGACAAGTTTGTACAAAAAAGCAGGCTTCATGGTGACGGACGATAGCAA  
CT

SWN- R: GGGGACCACTTTGTACAAGAAAGCTGGGTC

TCAATGAGATTGGTGCTTTCTGGC
