# Supplementary material for: The Arabidopsis SWI2/SNF2 Chromatin Remodeler BRAHMA Regulates Polycomb Function during Vegetative Development and Directly Activates the Flowering Repressor Gene SVP
Source: PLoS Genet. 2015 Jan 23;11(1):e1004944. doi: 10.1371/journal.pgen.1004944 (PMC4304717; doi:10.1371/journal.pgen.1004944)
Supplement: S2 Dataset — (XLSX) [file pgen.1004944.s012.xlsx]

## Sheet: Sheet1
Supplymental Data Set 2: List of Genes with More than 2-fold Changes in H3K27me3 levels in brm-1 Seedlings Compared with Col
Genes with a two fold H3K27me3 increase in brm-1									Genes with a two fold H3K27me3 decrease in brm-1
AT1G01120	AT1G01120:Encodes a condensing enzyme KCS1 (3-ketoacyl-CoA synthase 1) which is involved in the critical fatty acid elongation process in wax biosynthesis.								AT1G03170	AT1G03170:FANTASTIC FOUR 2 (FAF2). A member of the FAF family proteins encoded by the FANTASTIC FOUR (FAF) genes: AT4G02810 (FAF1), AT1G03170 (FAF2), AT5G19260 (FAF3) and AT3G06020 (FAF4). FAFs have the potential to regulate shoot meristem size in Arabidopsis thaliana. FAFs can repress WUS, which ultimately leads to an arrest of meristem activity in FAF overexpressing lines.
AT1G02575	AT1G02575:unknown protein								AT1G08860	AT1G08860:Encodes a copine-like protein, which is a member of a newly identified class of calcium-dependent, phospholipid binding proteins that are present in a wide range of organisms. Overexpression of this gene suppresses bon1-1 phenotypes. Double mutant analyses with bon1-1 suggest that BON1 and BON3 have overlapping functions in maintaining cellular homeostasis and inhibiting cell death. BON…
AT1G02650	AT1G02650:Tetratricopeptide repeat (TPR)-like superfamily protein; FUNCTIONS IN: heat shock protein binding								AT2G41225	AT2G41225:unknown protein
AT1G02980	AT1G02980:CULLIN 2 (CUL2) (ATCUL2).Encodes an Arabidopsis cullin.								AT2G47260	AT2G47260:WRKY DNA-BINDING PROTEIN 23 (ATWRKY23). Encodes a member of WRKY Transcription Factor; Group I. Involved in nematode feeding site establishment.
AT1G03850	AT1G03850:Encodes glutaredoxin ATGRXS13, required to facilitate Botrytis cinerea infection of Arabidopsis thaliana plants.								AT2G47270	AT2G47270:Encodes UPBEAT1 (UPB1), a transcription factor with a bHLH domain. Regulates the expression of a set of peroxidases that modulate the balance of reactive oxygen species (ROS) between the zones of cell proliferation and the zone of cell elongation where differentiation begins. Disruption of UPB1 activity alters this ROS balance, leading to a delay in the onset of differentiation. UPBEAT1…
AT1G03870	AT1G03870:fasciclin-like arabinogalactan-protein 9 (Fla9)								AT3G10815	AT3G10815:RING/U-box superfamily protein
AT1G04120	AT1G04120:ATP-BINDING CASSETTE C5 (ABCC5),encodes a high-affinity inositol hexakisphosphate transporter that plays a role in guard cell signaling and phytate storage. It is a member of MRP subfamily / ABC transporter subfamily C.								AT3G17720	AT3G17720:Pyridoxal phosphate (PLP)-dependent transferases superfamily protein
AT1G05065	AT1G05065: Member of a large family of putative ligands homologous to the Clavata3 gene								AT3G23030	AT3G23030:INDOLE-3-ACETIC ACID INDUCIBLE 2 (IAA2). Auxin inducible gene expressed in the nucleus .
AT1G05740	AT1G05740:Eukaryotic protein of unknown function (DUF842)								AT3G54270	AT3G54270:Sucrose-6F-phosphate phosphohydrolase family protein
AT1G05810	AT1G05810:RAB GTPase homolog A5E (RABA5E)								AT3G57460	AT3G57460:Catalytics;metal ion binding
AT1G05930	AT1G05930:unknown protein								AT4G10260	AT4G10260:pfkB-like carbohydrate kinase family protein
AT1G06980	AT1G06980:unknown protein								AT4G10265	AT4G10265:Wound-responsive family protein
AT1G07200	AT1G07200:Double Clp-N motif-containing P-loop nucleoside triphosphate hydrolases superfamily protein								AT4G21930	AT4G21930:Protein of unknown function, DUF584
AT1G09157	AT1G09157:Protein of unknown function (DUF679)								AT5G54800	AT5G54800:ARABIDOPSIS GLUCOSE 6-PHOSPHATE/PHOSPHATE TRANSLOCATOR 1 (ATGPT1). Encodes glucose6-Phosphate/phosphate transporter 1. Essential for pollen maturation and embryo sac development.
AT1G09880	AT1G09880:Rhamnogalacturonate lyase family protein								AT5G61090	AT5G61090:Polynucleotidyl transferase, ribonuclease H-like superfamily protein
AT1G10652	AT1G10652:unknown protein								AT5G61100	AT5G61100:BEST Arabidopsis thaliana protein match is: zinc ion binding (TAIR:AT5G61110.1)
AT1G11150	AT1G11150:transposable element gene; pseudogene, similar to putative AP endonuclease/reverse transcriptase								AT5G61120	AT5G61120:BEST Arabidopsis thaliana protein match is: Polynucleotidyl transferase, ribonuclease H-like superfamily protein
AT1G12020	AT1G12020:unknown protein								AT5G65230	AT5G65230:Member of the R2R3 factor gene family. MYB DOMAIN PROTEIN 53 (AtMYB53)
AT1G12040	AT1G12040:encodes a a chimeric leucine-rich repeat/extensin protein that regulates root hair morphogenesis and elongation. LEUCINE-RICH REPEAT/EXTENSIN 1 (LRX1) LEUCINE-RICH REPEAT/EXTENSIN 1 (LRX1)
AT1G12740	AT1G12740:encodes a protein with cytochrome P450 domain . "CYTOCHROME P450, FAMILY 87, SUBFAMILY A, POLYPEPTIDE 2" (CYP87A2)
AT1G13610	AT1G13610:alpha/beta-Hydrolases superfamily proteinprotein_coding
AT1G14600	AT1G14600:Homeodomain-like superfamily protein
AT1G15210	AT1G15210:pleiotropic drug resistance 7 (PDR7); FUNCTIONS IN: ATPase activity, coupled to transmembrane movement of substances
AT1G16760	AT1G16760:Protein kinase protein with adenine nucleotide alpha hydrolases-like domain
AT1G18350	AT1G18350:MAP kinase kinase7. Member of plant mitogen-activated protein kinase kinase group D. Negative regulator of polar auxin transport.
AT1G22330	AT1G22330:RNA-binding (RRM/RBD/RNP motifs) family protein
AT1G22360	AT1G22360:UDP-glucosyl transferase 85A2 (UGT85A2)
AT1G22370	AT1G22370:UDP-glucosyl transferase 85A5 (UGT85A5)
AT1G22430	AT1G22430:GroES-like zinc-binding dehydrogenase family protein
AT1G29480	AT1G29480:unknown protein
AT1G29550	AT1G29550:Eukaryotic initiation factor 4E protein; FUNCTIONS IN: RNA binding, translation initiation factor activity
AT1G31090	AT1G31090:F-box family protein
AT1G31319	AT1G31319:unknown protein
AT1G31390	AT1G31390:TRAF-like family protein
AT1G35560	AT1G35560:TCP family transcription factor
AT1G35730	AT1G35730:Encodes a member of the Arabidopsis Pumilio (APUM) proteins containing PUF domain (eight repeats of approximately 36 amino acids each). PUF proteins regulate both mRNA stability and translation through sequence-specific binding to the 3' UTR of target mRNA transcripts. PUMILIO 9 (PUM9)
AT1G36940	AT1G36940:unknown protein
AT1G43630	AT1G43630:FUNCTIONS IN: molecular_function unknown
AT1G44900	AT1G44900:Encodes MCM2 (MINICHROMOSOME MAINTENANCE 2), a protein essential to embryo development. Overexpression results in altered root meristem function.
AT1G47370	AT1G47370:Toll-Interleukin-Resistance (TIR) domain family protein
AT1G47395	AT1G47395:unknown protein
AT1G47400	AT1G47400:unknown protein
AT1G47410	AT1G47410:unknown protein
AT1G48640	AT1G48640:Transmembrane amino acid transporter family protein
AT1G50470	AT1G50470:F-box associated ubiquitination effector family protein
AT1G50930	AT1G50930:unknown protein
AT1G52290	AT1G52290:Encodes a member of the proline-rich extensin-like receptor kinase (PERK) family. PROLINE-RICH EXTENSIN-LIKE RECEPTOR KINASE 15 (PERK15)
AT1G53180	AT1G53180:unknown protein
AT1G54120	AT1G54120:unknown protein
AT1G54400	AT1G54400:HSP20-like chaperones superfamily protein
AT1G54410	AT1G54410:Dehydrin family protein
AT1G54590	AT1G54590:INVOLVED IN: RNA splicing
AT1G54740	AT1G54740:protein of unknown function (DUF3049)
AT1G54760	AT1G54760:AGAMOUS-like 85 (AGL85)
AT1G55110	AT1G55110:Indeterminate(ID)-domain 7 (IDD7)
AT1G56660	AT1G56660:unknown protein
AT1G57650	AT1G57650:ATP binding
AT1G58170	AT1G58170:Disease resistance-responsive (dirigent-like protein) family protein
AT1G59630	AT1G59630:F-box associated ubiquitination effector family protein
AT1G59960	AT1G59960:NAD(P)-linked oxidoreductase superfamily protein
AT1G62240	AT1G62240:unknown protein
AT1G62630	AT1G62630:Disease resistance protein (CC-NBS-LRR class) family
AT1G64480	AT1G64480:Calcineurin B-like protein 8, member of plant-specific family of calcium sensor proteins containing 3 EF-hand motifs. CALCINEURIN B-LIKE PROTEIN 8 (CBL8)
AT1G67775	AT1G67775:Member of a large family of putative ligands homologous to the Clavata3 gene. Consists of a single exon.CLAVATA3/ESR-RELATED 8 (CLE8)
AT1G68825	AT1G68825:ROTUNDIFOLIA like 15 (RTFL15)
AT1G69850	AT1G69850:Encodes an inducible component of low-affinity nitrate uptake. mRNA found primarily in root hairs and the epidermis of roots. protein_coding NITRATE TRANSPORTER 1:2 (NRT1:2)
AT1G71970	AT1G71970:unknown protein
AT1G72130	AT1G72130:Major facilitator superfamily protein
AT1G72210	AT1G72210:Basic helix-loop-helix (bHLH) DNA-binding superfamily protein
AT1G73010	AT1G73010:Encodes PPsPase1, a pyrophosphate-specific phosphatase catalyzing the specific cleavage of pyrophosphate (Km 38.8 uM) with an alkaline catalytic pH optimum. PHOSPHATE STARVATION-INDUCED GENE 2 (PS2)
AT1G73850	AT1G73850:FUNCTIONS IN: structural constituent of ribosome
AT1G74460	AT1G74460:GDSL-like Lipase/Acylhydrolase superfamily protein
AT1G76070	AT1G76070:unknown protein
AT1G76110	AT1G76110:HMG (high mobility group) box protein with ARID/BRIGHT DNA-binding domain
AT1G76130	AT1G76130:Alpha-amylase, putative / 1,4-alpha-D-glucan glucanohydrolase, putative, strong similarity to alpha-amylase. ALPHA-AMYLASE-LIKE 2 (AMY2)
AT1G76410	AT1G76410:ATL8; FUNCTIONS IN: zinc ion binding
AT1G77210	AT1G77210:AtSTP14 belongs to the family of sugar transport proteins (AtSTPs)in volved in monosaccharide transport. Heterologous expression in yeast revealed that AtSTP14 is the transporter specifc for galactose and does not transport other monosaccharides such as glucose or fructose. SUGAR TRANSPORT PROTEIN 14 (STP14)
AT1G77920	AT1G77920:bZIP transcription factor family protein
AT1G78440	AT1G78440:Encodes a gibberellin 2-oxidase that acts on C19 gibberellins. ARABIDOPSIS THALIANA GIBBERELLIN 2-OXIDASE 1 (ATGA2OX1)
AT2G01554	AT2G01554:unknown protein
AT2G02280	AT2G02280:Phloem protein 2-B4 (PP2-B4)
AT2G03505	AT2G03505:Carbohydrate-binding X8 domain superfamily protein
AT2G03550	AT2G03550:Alpha/beta-Hydrolases superfamily protein
AT2G04795	AT2G04795:unknown protein
AT2G05370	AT2G05370:BEST Arabidopsis thaliana protein match is: RNA-dependent RNA polymerase 6
AT2G07690	AT2G07690:Member of the minichromosome maintenance complex, involved in DNA replication initiation. Abundant in proliferating and endocycling tissues. Localized in the nucleus during G1, S and G2 phases of the cell cycle, and are released into the cytoplasmic compartment during mitosis. Binds chromatin. protein_coding MINICHROMOSOME MAINTENANCE 5 (MCM5)
AT2G14420	AT2G14420:Transposable element gene; Mutator-like transposase family
AT2G14510	AT2G14510:Leucine-rich repeat protein kinase family protein
AT2G16580	AT2G16580:SAUR-like auxin-responsive protein family
AT2G17300	AT2G17300:unknown protein
AT2G17500	AT2G17500:Auxin efflux carrier family protein
AT2G22170	AT2G22170:Lipase/lipooxygenase, PLAT/LH2 family protein
AT2G22290	AT2G22290:RAB GTPase homolog H1D (RABH1d)
AT2G22540	AT2G22540:Encodes a nuclear protein that acts as a floral repressor and that functions within the thermosensory pathway. SVP represses FT expression via direct binding to the vCArG III motif in the FT promoter. SHORT VEGETATIVE PHASE (SVP);AGAMOUS-LIKE 22 (AGL22)
AT2G22807	AT2G22807:Encodes a defensin-like (DEFL) family protein. protein_coding
AT2G24615	AT2G24615:Encodes a defensin-like (DEFL) family protein. protein_coding
AT2G26400	AT2G26400:Encodes a protein predicted to belong to the acireductone dioxygenase (ARD/ARD?)family.ACIREDUCTONE DIOXYGENASE 3 (ARD3)
AT2G26440	AT2G26440:Plant invertase/pectin methylesterase inhibitor superfamily
AT2G28080	AT2G28080:UDP-Glycosyltransferase superfamily protein
AT2G28200	AT2G28200:C2H2-type zinc finger family protein
AT2G28690	AT2G28690:Protein of unknown function (DUF1635)
AT2G29660	AT2G29660:zinc finger (C2H2 type) family protein
AT2G29730	AT2G29730:UDP-glucosyl transferase 71D1 (UGT71D1)
AT2G29740	AT2G29740:UDP-glucosyl transferase 71C2 (UGT71C2)
AT2G30010	AT2G30010:Encodes a member of the TBL (TRICHOME BIREFRINGENCE-LIKE) gene family containing a plant-specific DUF231 (domain of unknown function) domain. TBL gene family has 46 members, two of which (TBR/AT5G06700 and TBL3/AT5G01360) have been shown to be involved in the synthesis and deposition of secondary wall cellulose, presumably by influencing the esterification state of pectic polymers. A no…
AT2G31345	AT2G31345:unknown protein
AT2G32905	AT2G32905:Domain of unknown function (DUF313)
AT2G35290	AT2G35290:unknown protein
AT2G35670	AT2G35670:Encodes a negative regulator of seed development in the absence of pollination. In the ovule, the FIS2 transcripts are accumulated at their highest level before fertilization and gradually decrease after fertilization.FERTILIZATION INDEPENDENT SEED 2 (FIS2)
AT2G37450	AT2G37450:nodulin MtN21 /EamA-like transporter family protein
AT2G40330	AT2G40330:Encodes a member of the PYR (pyrabactin resistance )/PYL(PYR1-like)/RCAR (regulatory components of ABA receptor) family proteins .PYR/PYL/RCAR family proteins function as abscisic acid sensors. Mediate ABA-dependent regulation of protein phosphatase 2Cs ABI1 and ABI2. REGULATORY COMPONENTS OF ABA RECEPTOR 9 (RCAR9);PYR1-LIKE 6 (PYL6)
AT2G40340	AT2G40340:Encodes a member of the DREB subfamily A-2 of ERF/AP2 transcription factor family. The protein contains one AP2 domain. There are eight members in this subfamily including DREB2A AND DREB2B that are involved in response to drought.(DREB2C); (AtERF48)
AT2G42040	AT2G42040:CONTAINS InterPro DOMAIN/s: WRC
AT2G42380	AT2G42380:Encodes a member of the BZIP family of transcription factors. Forms heterodimers with the related protein AtbZIP61. Binds to G-boxes in vitro and is localized to the nucleus in onion epidermal cells. (ATBZIP34)
AT2G43140	AT2G43140:Basic helix-loop-helix (bHLH) DNA-binding superfamily protein
AT2G43340	AT2G43340:Protein of unknown function (DUF1685)
AT2G45340	AT2G45340:Leucine-rich repeat protein kinase family protein
AT2G45410	AT2G45410:LOB domain-containing protein 19 (LBD19)
AT2G45450	AT2G45450: ZPR1, a small leucine zipper-containing protein that interacts with REV HD-ZIPIII and
AT2G46660	AT2G46660:"CYTOCHROME P450, FAMILY 78, SUBFAMILY A, POLYPEPTIDE 6" (CYP78A6)
AT2G46685	AT2G46685:MICRORNA166A (MIR166A).Encodes a microRNA that targets several HD-ZIPIII family members including PHV, PHB, REV, ATHB-8, and ATHB-15. This particular miRNA is involved in the regulation of vascular development in inflorescence stems, primarily through the regulation of mRNA cleavage of the class III homeodomain-leucine zipper transcription factor ATHB15.
AT2G48030	AT2G48030:DNAse I-like superfamily protein
AT3G01860	AT3G01860:unknown protein
AT3G04765	AT3G04765:Encodes a microRNA that targets ARF family members ARF6 and ARF8. Mature sequence: UAAGCUGCCAGCAUGAUCUUG miRNA MICRORNA167C (MIR167C) MICRORNA167C (MIR167C)
AT3G06435	AT3G06435:Expressed protein
AT3G11660	AT3G11660:Encodes a protein whose sequence is similar to tobacco hairpin-induced gene (HIN1) and Arabidopsis non-race specific disease resistance gene (NDR1). NDR1/HIN1-LIKE 1 (NHL1) NDR1/HIN1-LIKE 1 (NHL1)
AT3G13784	AT3G13784:cell wall invertase 5 (CWINV5)
AT3G14440	AT3G14440:Encodes 9-cis-epoxycarotenoid dioxygenase, a key enzyme in the biosynthesis of abscisic acid. Regulated in response to drought and salinity. NINE-CIS-EPOXYCAROTENOID DIOXYGENASE 3 (NCED3) NINE-CIS-EPOXYCAROTENOID DIOXYGENASE 3 (NCED3);SUGAR INSENSITIVE 7 (SIS7);SALT TOLERANT 1 (STO1); (ATNCED3)
AT3G14950	AT3G14950:Encodes one of the 36 carboxylate clamp (CC)-tetratricopeptide repeat (TPR) proteins (Prasad 2010, Pubmed ID: 20856808) with potential to interact with Hsp90/Hsp70 as co-chaperones. TETRATRICOPETIDE-REPEAT THIOREDOXIN-LIKE 2 (TTL2)
AT3G15820	AT3G15820:Functions as phosphatidylcholine:diacylglycerol cholinephosphotransferase, a major reaction for the transfer of 18:1 into phosphatidylcholine for desaturation and also for the reverse transfer of 18:2 and 18:3 into the triacylglycerols synthesis pathway.REDUCED OLEATE DESATURATION 1 (ROD1)
AT3G19600	AT3G19600:C-TERMINAL DOMAIN PHOSPHATASE-LIKE 5 (CPL5). It positively regulates ABA and drought responses.
AT3G22160	AT3G22160:VQ motif-containing protein
AT3G22820	AT3G22820:Allergen-related.CHALLAH-LIKE 1 (CLL1) EPIDERMAL PATTERNING FACTOR LIKE 5 (EPFL5);CHALLAH-LIKE 1 (CLL1)
AT3G23430	AT3G23430:Encodes protein with the mainly hydrophilic N-terminal and the C-terminal containing 6 potential membrane-spanning domains. ARABIDOPSIS PHOSPHATE 1 (ATPHO1)
AT3G24093	AT3G24093:Paired amphipathic helix (PAH2) superfamily protein
AT3G24216	AT3G24216:unknown protein
AT3G24600	AT3G24600:Late embryogenesis abundant protein, group 2
AT3G25597	AT3G25597:unknown protein
AT3G25770	AT3G25770:Encodes allene oxide cyclase.ALLENE OXIDE CYCLASE 2 (AOC2)
AT3G25905	AT3G25905:Member of a large family of putative ligands homologous to the Clavata3 gene. Consists of a single exon.CLAVATA3/ESR-RELATED 27 (CLE27)
AT3G26250	AT3G26250:Cysteine/Histidine-rich C1 domain family protein
AT3G26590	AT3G26590:MATE efflux family protein
AT3G28200	AT3G28200:Peroxidase superfamily protein
AT3G28440	AT3G28440:unknown protein
AT3G29380	AT3G29380:PLANT-SPECIFIC TFIIB-RELATED PROTEIN 2 (pBRP2) .Encodes a TFIIB-related protein expressed in the reproductive organs and seeds. Loss-of-function specifically affects the development of the syncytial endosperm. It is not required for RNA polymerase IV or V activities.
AT3G29791	AT3G29791:unknown protein
AT3G30160	AT3G30160:unknown protein
AT3G43315	AT3G43315:Transposable element gene; non-LTR retrotransposon family (LINE)
AT3G44720	AT3G44720:Encodes a plastid-localized arogenate dehydratase involved in phenylalanine biosynthesis. AROGENATE DEHYDRATASE 4 (ADT4)
AT3G44840	AT3G44840:S-adenosyl-L-methionine-dependent methyltransferases superfamily protein
AT3G44970	AT3G44970:Cytochrome P450 superfamily protein
AT3G52080	AT3G52080:Encodes a cation:proton exchanger expressed in pollen .CATION/HYDROGEN EXCHANGER 28 (chx28)
AT3G52770	AT3G52770:ZPR3 is a small-leucine zipper containing protein that is involved in the establishment of leaf polarity. LITTLE ZIPPER 3 (ZPR3)
AT3G53840	AT3G53840:Protein kinase superfamily protein
AT3G54990	AT3G54990:Encodes a AP2 domain transcription factor that can repress flowering. SMZ and its paralogous gene, SNARCHZAPFEN (SNZ
AT3G60980	AT3G60980:Tetratricopeptide repeat (TPR)-like superfamily protein
AT3G61680	AT3G61680:Alpha/beta-Hydrolases superfamily protein
AT3G62690	AT3G62690:ATL5 (ATL5). Encodes a RING-H2 zinc finger protein related to ATL2. The ATL gene family is represented by fifteen sequences that contain, in addition to the RING, a transmembrane domain which is located in most of them towards the N-terminal end.
AT4G00150	AT4G00150:Belongs to one of the LOM (LOST MERISTEMS) genes: AT2G45160 (LOM1), AT3G60630 (LOM2) and AT4G00150 (LOM3). LOM1 and LOM2 promote cell differentiation at the periphery of shoot meristems and help to maintain their polar organization.
AT4G08134	AT4G08134:Transposable element gene; gypsy-like retrotransposon family
AT4G10640	AT4G10640:IQ-domain 16 (IQD16)
AT4G10695	AT4G10695:CDC68-related
AT4G12850	AT4G12850:Far-red impaired responsive (FAR1) family protein
AT4G13195	AT4G13195:CLAVATA3/ESR-RELATED 44 (CLE44). Belongs to a large gene family, called CLE for CLAVATA3/ESR-related, encoding small peptides with conserved carboxyl termini. The C-terminal 12 amino acid sequence of CLE44 is identical to that of a dodeca peptide (TDIF, tracheary element differentiation inhibitory factor) isolated from Arabidopsis and functions as a suppressor of plant stem cell differe…
AT4G14250	AT4G14250:Structural constituent of ribosome
AT4G14580	AT4G14580:CBL-interacting protein kinase protein_coding CBL-INTERACTING PROTEIN KINASE 4 (CIPK4) ,SNF1-RELATED PROTEIN KINASE 3.3 (SnRK3.3)
AT4G15053	AT4G15053:Protein of Unknown Function (DUF239)
AT4G15490	AT4G15490:Encodes a protein that might have sinapic acid:UDP-glucose glucosyltransferase activity. (UGT84A3)
AT4G15870	AT4G15870:Encodes a putative terpene synthase. TERPENE SYNTHASE 1 (ATTS1)
AT4G16990	AT4G16990:RESISTANCE TO LEPTOSPHAERIA MACULANS 3 (RLM3)
AT4G17245	AT4G17245:RING/U-box superfamily protein
AT4G17460	AT4G17460:Encodes homeobox protein HAT1. protein_coding (HAT1) (HAT1)
AT4G17500	AT4G17500:Encodes a member of the ERF (ethylene response factor) subfamily B-3 of ERF/AP2 transcription factor family (ATERF-1). The protein contains one AP2 domain. ETHYLENE RESPONSIVE ELEMENT BINDING FACTOR 1 (ERF-1)
AT4G17810	AT4G17810:C2H2 and C2HC zinc fingers superfamily protein
AT4G18330	AT4G18330:Translation elongation factor EF1A/initiation factor IF2gamma family protein
AT4G18390	AT4G18390:"TEOSINTE BRANCHED 1, cycloidea and PCF transcription factor 2" (TCP2)
AT4G18640	AT4G18640:MORPHOGENESIS OF ROOT HAIR 1 (MRH1). Required for root hair elongation during tip growth.
AT4G19820	AT4G19820:Glycosyl hydrolase family protein with chitinase insertion domain
AT4G20450	AT4G20450:Leucine-rich repeat protein kinase family protein
AT4G21500	AT4G21500:unknown protein
AT4G21970	AT4G21970:Protein of unknown function, DUF584
AT4G23870	AT4G23870:unknown protein
AT4G24540	AT4G24540:Encodes a MADS-box protein involved in flowering. Regulates the expression of SOC1 and is also upregulated by SOC1. Binds with IMK3 kinase domain. Phosphorylated by IMK3; likely to be a target for IMK3 kinase domain. AGAMOUS-LIKE 24 (AGL24)
AT4G24660	AT4G24660:homeobox protein 22 (HB22)
AT4G26700	AT4G26700:Fimbrin-like protein protein_coding FIMBRIN 1 (FIM1)
AT4G29550	AT4G29550:Protein of unknown function (DUF626)
AT4G31730	AT4G31730:Glutamine dumper1 is a putative transmembrane protein. It is involved in glutamine secretion. GLUTAMINE DUMPER 1 (GDU1)
AT4G33040	AT4G33040:Thioredoxin superfamily protein
AT4G34760	AT4G34760:SAUR-like auxin-responsive protein family
AT4G34770	AT4G34770:SAUR-like auxin-responsive protein family
AT4G34780	AT4G34780:SAUR-like auxin-responsive protein family
AT4G34790	AT4G34790:SAUR-like auxin-responsive protein family
AT4G34800	AT4G34800:SAUR-like auxin-responsive protein family
AT4G36110	AT4G36110:SAUR-like auxin-responsive protein family
AT4G37540	AT4G37540:LOB domain-containing protein 39 (LBD39)
AT4G38860	AT4G38860:SAUR-like auxin-responsive protein family
AT5G03550	AT5G03550:BEST Arabidopsis thaliana protein match is: TRAF-like family protein (TAIR:AT2G42460.1)
AT5G04310	AT5G04310:Pectin lyase-like superfamily protein
AT5G04386	AT5G04386:This gene encodes a small protein and has either evidence of transcription or purifying selection.
AT5G06300	AT5G06300:Putative lysine decarboxylase family protein
AT5G08640	AT5G08640:Encodes a flavonol synthase that catalyzes formation of flavonols from dihydroflavonols. FLAVONOL SYNTHASE 1 (FLS1) (ATFLS1)
AT5G08712	AT5G08712:Encodes a microRNA that targets several HD-ZIPIII family members including PHV, PHB, REV, ATHB-8, and ATHB-15.MICRORNA 166 (MIR166)
AT5G10945	AT5G10945:Encodes a microRNA that targets several SPL family members, including SPL3,4, and 5. By regulating the expression of SPL3 (and probably also SPL4 and SPL5), this microRNA regulates vegetative phase change. MICRORNA156D (MIR156D)
AT5G10946	AT5G10946:unknown protein
AT5G11660	AT5G11660:Protein of Unknown Function (DUF239)
AT5G14010	AT5G14010:Encodes KNUCKLES (KNU), a C2H2-type zinc finger protein with a conserved transcriptional repression motif. Mediates the repression of WUS in floral meristem determinacy control.
AT5G14995	AT5G14995:Encodes a ECA1 gametogenesis related family protein
AT5G15240	AT5G15240:Transmembrane amino acid transporter family protein
AT5G16023	AT5G16023:ROTUNDIFOLIA like 18 (RTFL18)
AT5G16120	AT5G16120:Alpha/beta-Hydrolases superfamily protein
AT5G16230	AT5G16230:Plant stearoyl-acyl-carrier-protein desaturase family protein
AT5G17480	AT5G17480:pollen calcium-binding protein 1 (PC1)
AT5G17490	AT5G17490:DELLA subfamily member involved in GA signal transduction. (AtRGL3)
AT5G19710	AT5G19710:unknown protein
AT5G19729	AT5G19729:This gene encodes a small protein and has either evidence of transcription or purifying selection.
AT5G19730	AT5G19730:Pectin lyase-like superfamily protein
AT5G21105	AT5G21105:Plant L-ascorbate oxidase
AT5G22090	AT5G22090:Protein of unknown function (DUF3049)
AT5G22390	AT5G22390:Protein of unknown function (DUF3049)
AT5G22890	AT5G22890:C2H2 and C2HC zinc fingers superfamily protein
AT5G24100	AT5G24100:Leucine-rich repeat protein kinase family protein
AT5G24240	AT5G24240:Phosphatidylinositol 3- and 4-kinase ;Ubiquitin family protein
AT5G24250	AT5G24250:unknown protein
AT5G25960	AT5G25960:Protein of Unknown Function (DUF239)
AT5G28960	AT5G28960:unknown protein
AT5G33382	AT5G33382:Transposable element gene; copia-like retrotransposon family
AT5G33390	AT5G33390:Glycine-rich protein
AT5G36180	AT5G36180:Serine carboxypeptidase-like 1 (scpl1)
AT5G38610	AT5G38610:Plant invertase/pectin methylesterase inhibitor superfamily protein
AT5G39010	AT5G39010:unknown protein
AT5G39760	AT5G39760:Homeobox protein 23 (HB23)
AT5G40020	AT5G40020:Pathogenesis-related thaumatin superfamily protein
AT5G41380	AT5G41380:CCT motif family protein
AT5G41410	AT5G41410:BELL 1 (BEL1). Homeodomain protein required for ovule identity.Loss of function mutations show homeotic conversion of integuments to carpels.Forms heterodimers with STM and KNAT1. Interacts with AG-SEP heterodimers is thought to restrict WUS expression. BEL interacts with MADS box dimers composed of SEP1(or SEP3) and AG, SHP1, SHP2 and STK. The interaction of BEL1 with AG-SEP3 is requir…
AT5G41905	AT5G41905:Encodes a microRNA that targets several HD-ZIPIII family members including PHV, PHB, REV, ATHB-8, and ATHB-15. MICRORNA166E (MIR166E)
AT5G42410	AT5G42410:SAUR-like auxin-responsive protein family
AT5G42750	AT5G42750:Encodes a plasma-membrane associated phosphoprotein that interacts directly with the kinase domain of BRI1. It interferes with the interaction between BRI1 with its signalling partner, the plasma membrane localised LRR-receptor kinase BAK1. BRI1 KINASE INHIBITOR 1 (BKI1)
AT5G43020	AT5G43020:Leucine-rich repeat protein kinase family protein
AT5G43570	AT5G43570:Predicted to encode a PR (pathogenesis-related) peptide that belongs to the PR-6 proteinase inhibitor family.
AT5G43603	AT5G43603:Encodes a microRNA that targets several HD-ZIPIII family members including PHV, PHB, REV, ATHB-8, and ATHB-15.MICRORNA166F (MIR166F)
AT5G43610	AT5G43610:Sucrose-proton symporter 6 (SUC6)
AT5G43760	AT5G43760:Encodes KCS20, a member of the 3-ketoacyl-CoA synthase family involved in the biosynthesis of VLCFA (very long chain fatty acids). protein_coding 3-KETOACYL-COA SYNTHASE 20 (KCS20)
AT5G43870	AT5G43870:FUNCTIONS IN: phosphoinositide binding
AT5G49700	AT5G49700:Predicted AT-hook DNA-binding family protein
AT5G50000	AT5G50000:Protein kinase superfamily protein
AT5G51845	AT5G51845:Encodes a defensin-like (DEFL) family protein.
AT5G51990	AT5G51990:Encodes a member of the DREB subfamily A-1 of ERF/AP2 transcription factor family (CBF4). The protein contains one AP2 domain. There are six members in this subfamily, including CBF1, CBF2, and CBF3. This gene is involved in response to drought stress and abscisic acid treatment, but not to low temperature. C-REPEAT-BINDING FACTOR 4 (CBF4)
AT5G52120	AT5G52120:Phloem protein 2-A14 (PP2-A14)
AT5G53030	AT5G53030:unknown protein
AT5G54990	AT5G54990:RING/U-box superfamily protein
AT5G55650	AT5G55650:unknown protein
AT5G56240	AT5G56240:Biological_process unknown
AT5G56840	AT5G56840:Myb-like transcription factor family protein
AT5G58360	AT5G58360:Ovate family protein 3 (OFP3)
AT5G63160	AT5G63160:BTB AND TAZ DOMAIN PROTEIN 1 (bt1). Short-lived nuclear-cytoplasmic protein targeted for degradation by the 26S proteosome pathway. Acts redundantly with BT2 and BT3 during female gametophyte development.
AT5G63240	AT5G63240:Carbohydrate-binding X8 domain superfamily protein
AT5G63850	AT5G63850:Amino acid transporter whose expression is downregulated by dehydration.AMINO ACID PERMEASE 4 (AAP4)
AT5G66940	AT5G66940:Dof-type zinc finger DNA-binding family protein
